# Supplementary material for: Dynamic restructuring of coordinatively unsaturated copper paddle wheel clusters drives CO2 reduction efficiently
Source: Research Square preprint supplement (doi:10.21203/rs.3.rs-354259/v1), 2021-04-02
Supplement: Supplementary file 2 [file 89b7e303cff9e96a7455671c.docx]

Supplementary Information

Dynamic restructuring of coordinatively unsaturated copper paddle wheel clusters drives CO2 reduction efficiently

Wei Zhang1,2, Chuqiang Huang1, Jiexin Zhu2, Qiancheng Zhou1, Ruohan Yu2, Yali Wang1, Pengfei An3, Jing Zhang3, Ming Qiu1, Liang Zhou2, Liqiang Mai2🖂, Zhiguo Yi4🖂 and Ying Yu1🖂

1 Institute of Nanoscience and Nanotechnology, College of Physical Science and Technology, Central China Normal University, Wuhan 430079, Hubei, P. R. China. 2 State Key Laboratory of Advanced Technology for Materials Synthesis and Processing, Wuhan University of Technology, Wuhan 430070, Hubei, P. R. China. 3 Beijing Synchrotron Radiation Facility, Institute of High Energy Physics, Chinese Academy of Science, Beijing 100049, P. R. China. 4 State Key Laboratory of High Performance Ceramics and Superfine Microstructure, Shanghai Institute of Ceramics, Chinese Academy of Sciences, Shanghai 200050, P. R. China. 🖂email: [mlq518@whut.edu.cn](mailto:mlq518@whut.edu.cn); [zhiguo@mail.sic.ac.cn](mailto:zhiguo@mail.sic.ac.cn); [yuying01@mail.ccnu.edu.cn](mailto:yuying01@mail.ccnu.edu.cn).


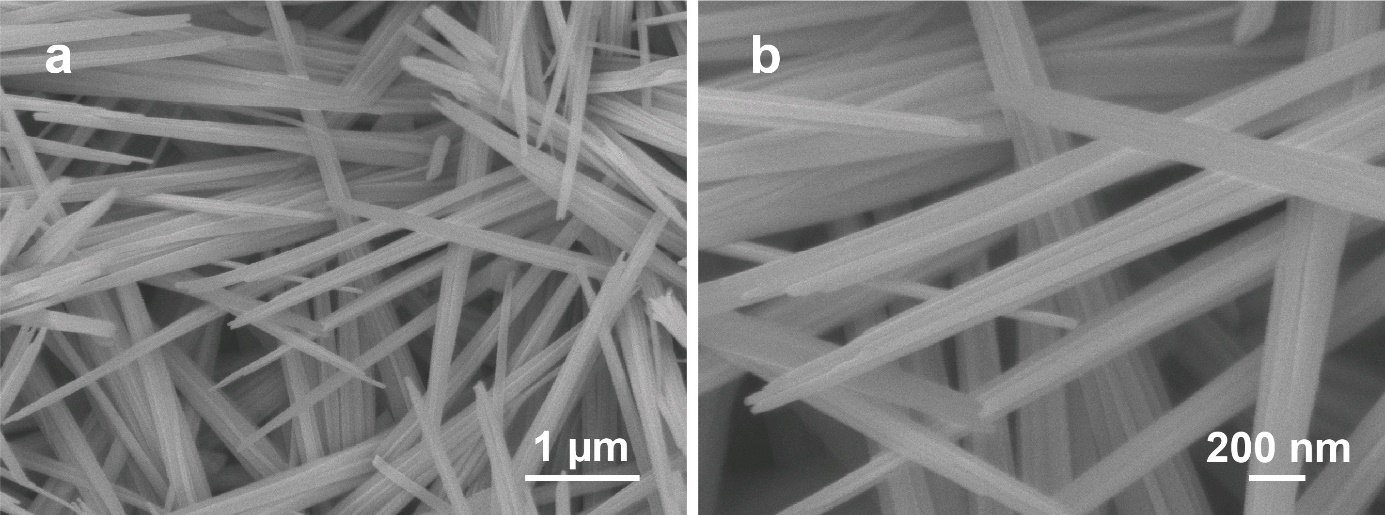


**Supplementary Figure 1.** SEM images of Cu(OH)2 NWs


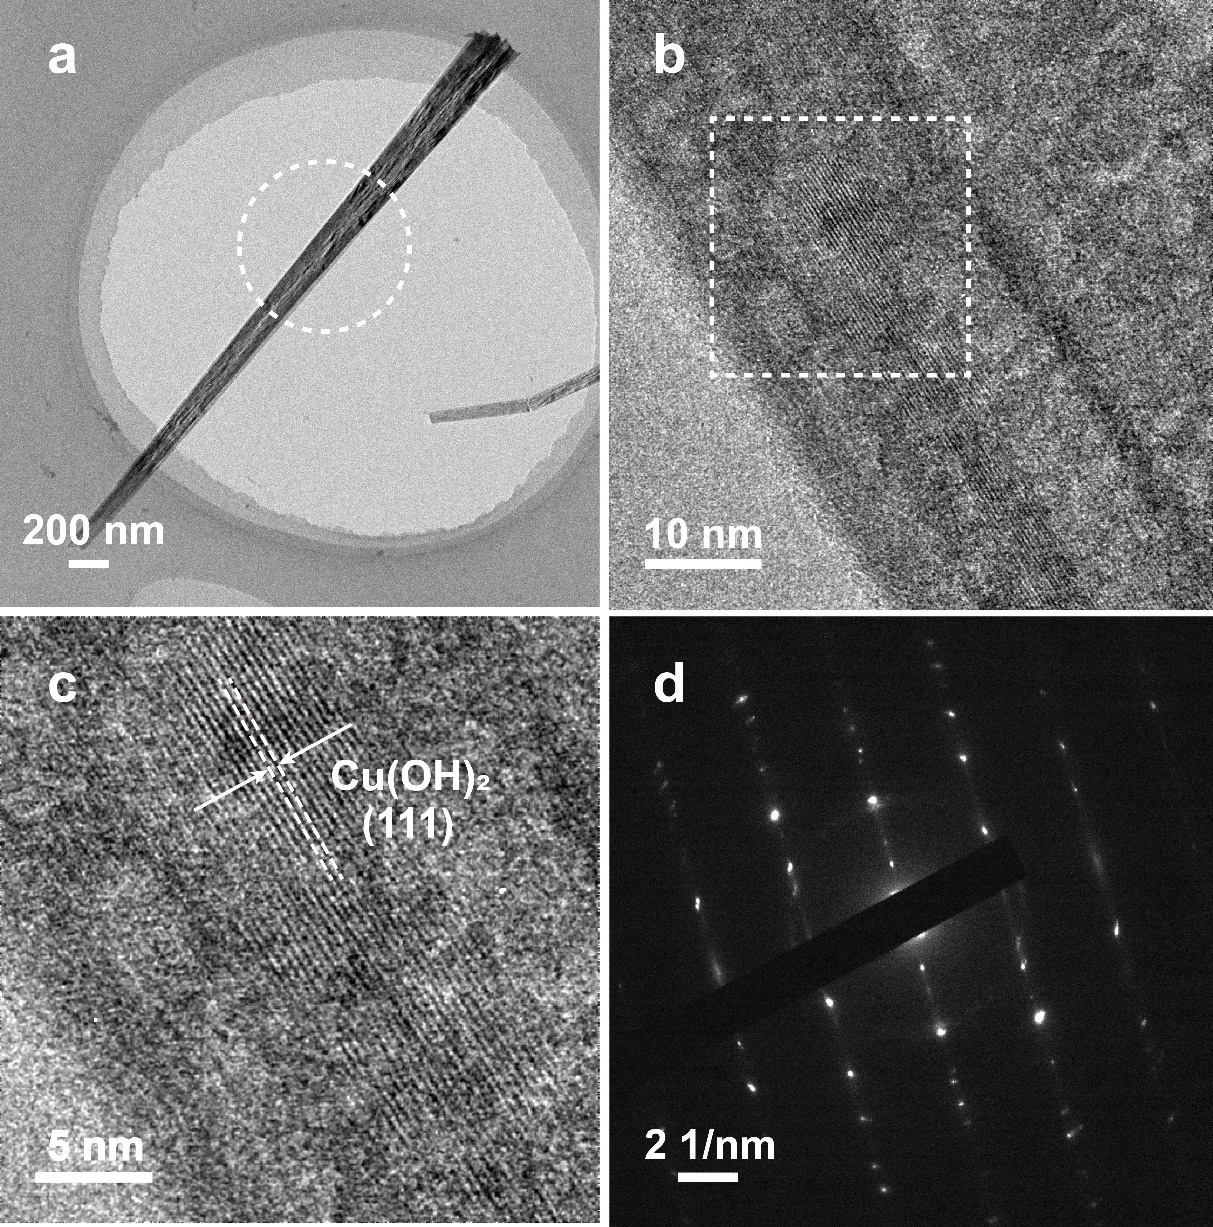


**Supplementary Figure 2.** (a) Low-magnification TEM image, (b, c) HRTEM images and (d) selected area electron diffraction (SAED) pattern of Cu(OH)2 NWs.


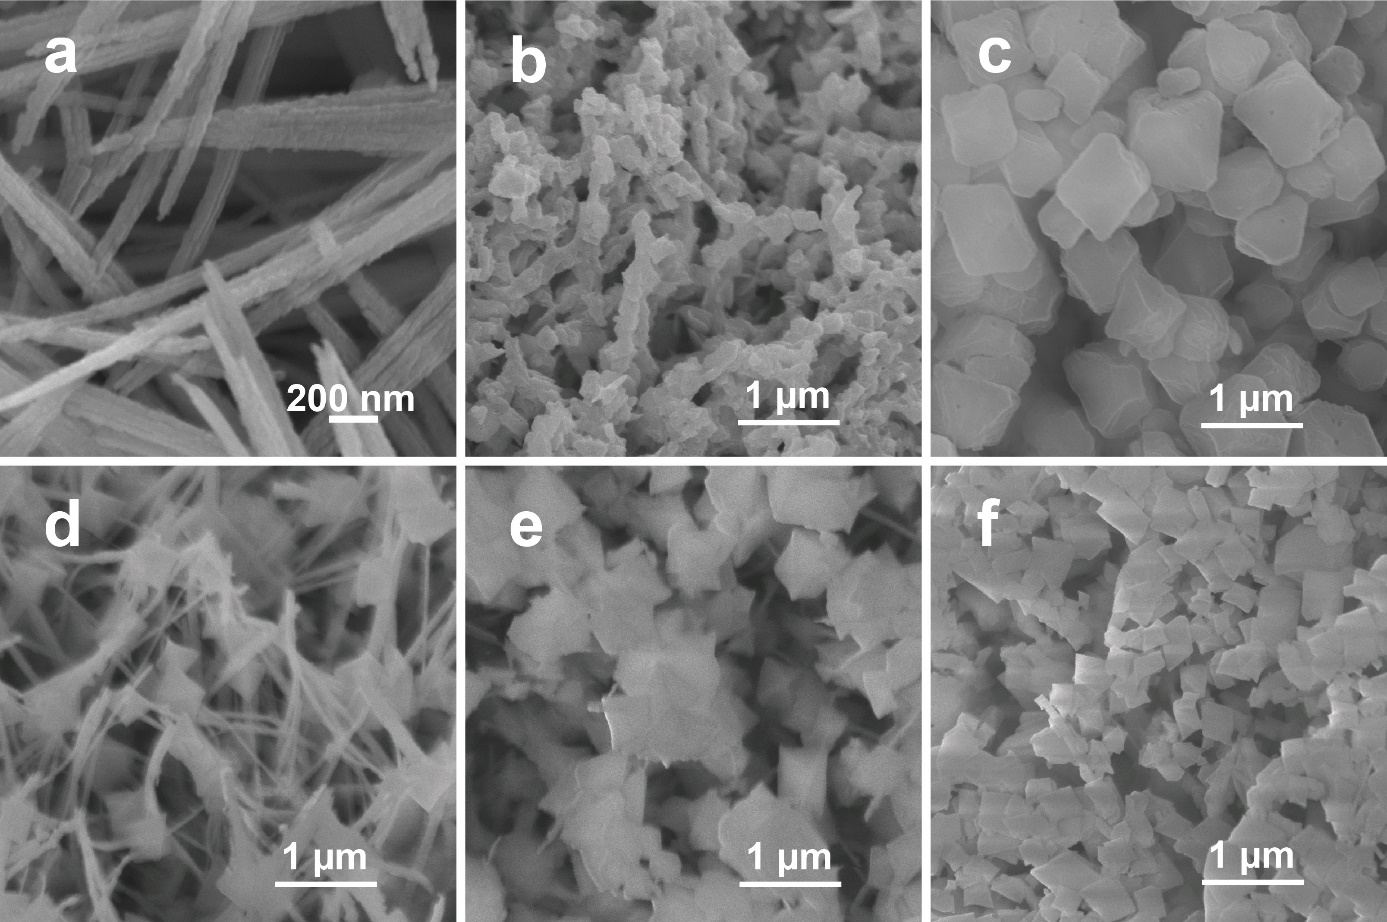


**Supplementary Figure 3.** (a-c) SEM images of samples prepared through “atomized method”. The reaction time was 120 s (a), 240 s (b), 480 s (c). (d-f) SEM images of samples prepared through “immersed method”. The immersed time was 10 s (d), 60 s (e) and 120 s (f).


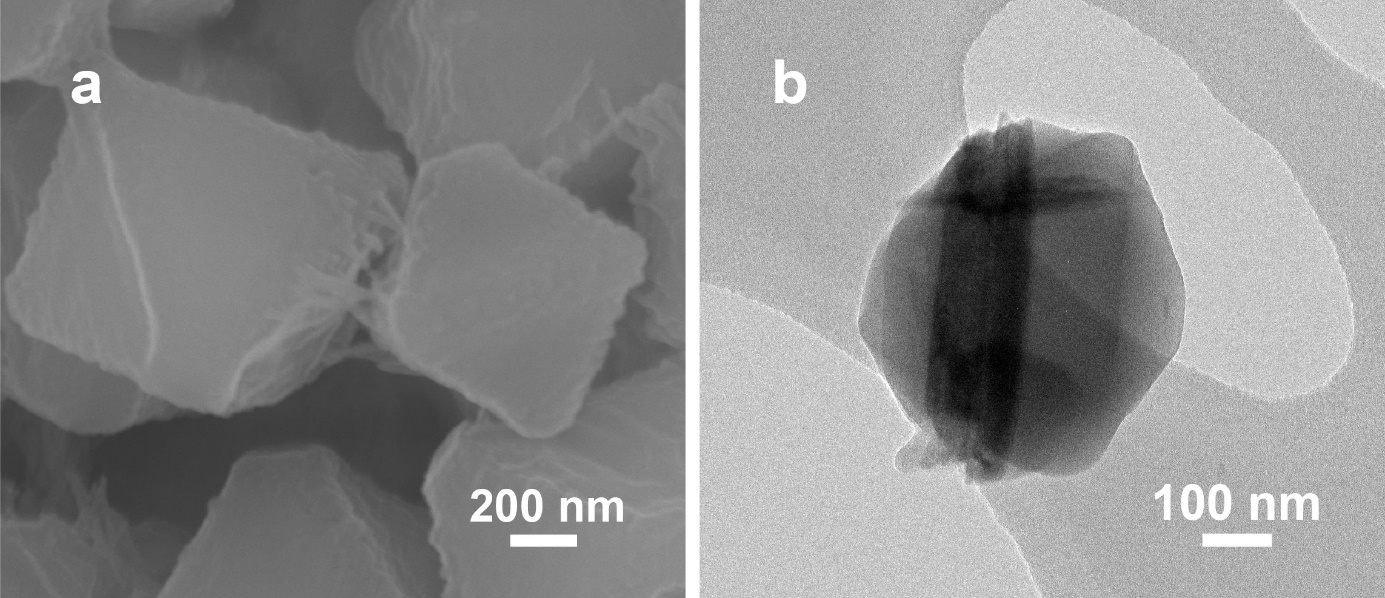


**Supplementary Figure 4.** (a) SEM image of CMOF. (b) TEM image of CMOF.


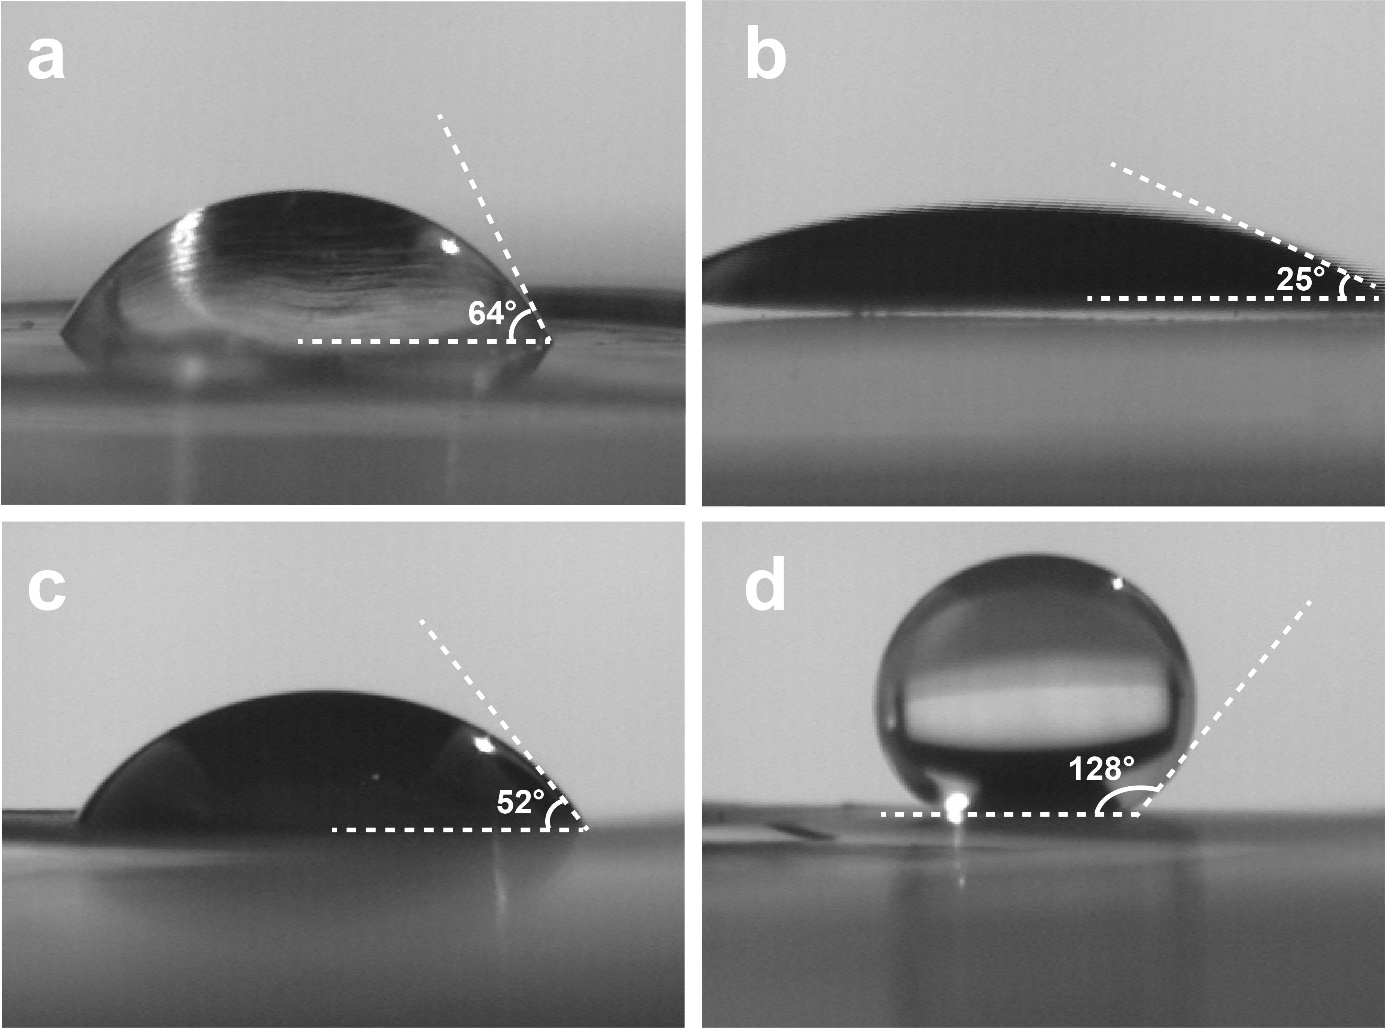


**Supplementary Figure 5.** (a-d) Contact angle of Cu foil, Cu(OH)2 NWs, QMOF and CMOF.


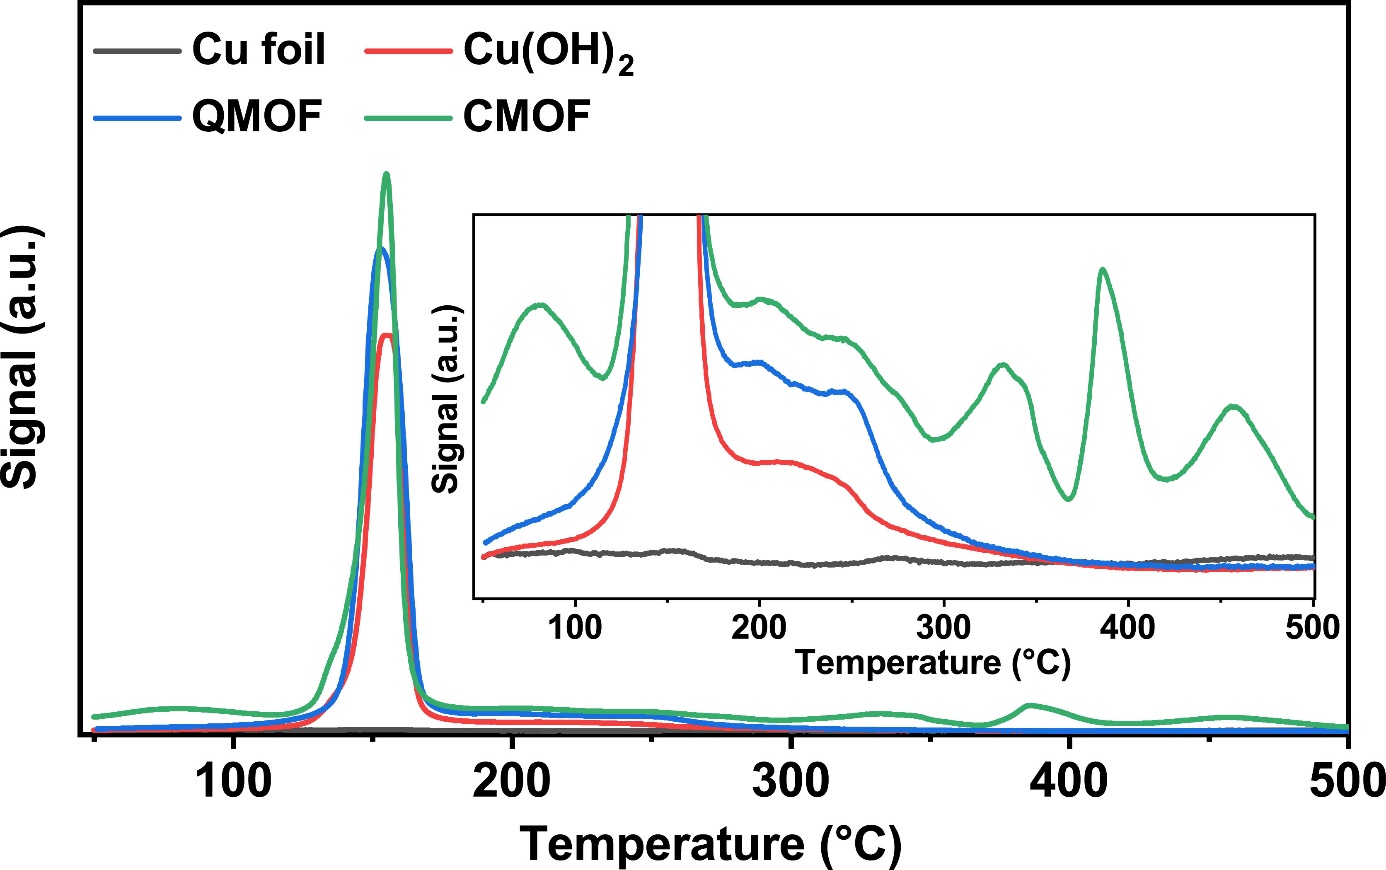


**Supplementary Figure 6.** CO2-temperature programmed desorption (TPD) measurement of Cu foil, Cu(OH)2 NWs, QMOF and CMOF.


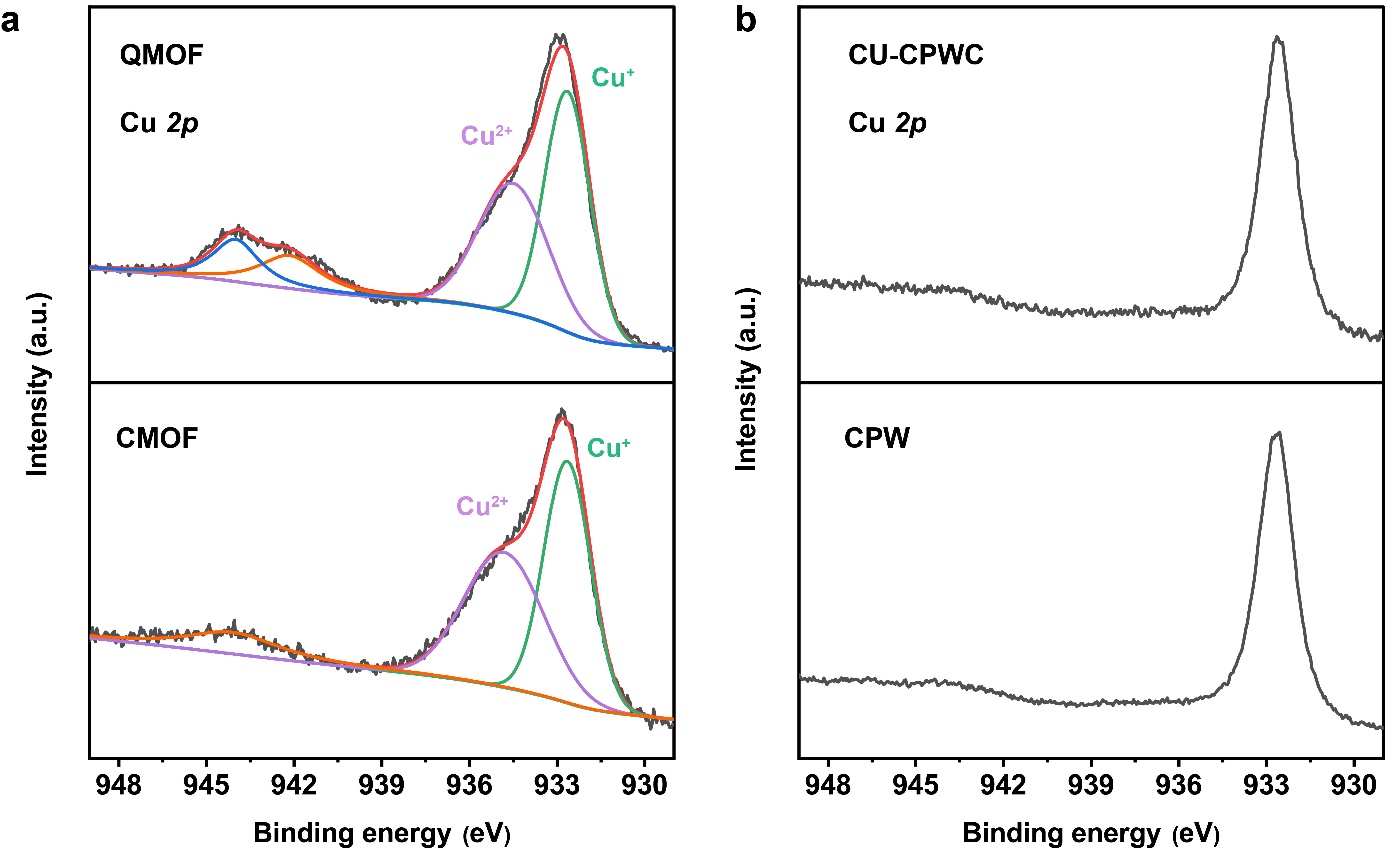


**Supplementary Figure 7.** (a) High-resolution XPS signals of Cu *2p* of QMOF and CMOF. (b) CU-CPWC and CPW.


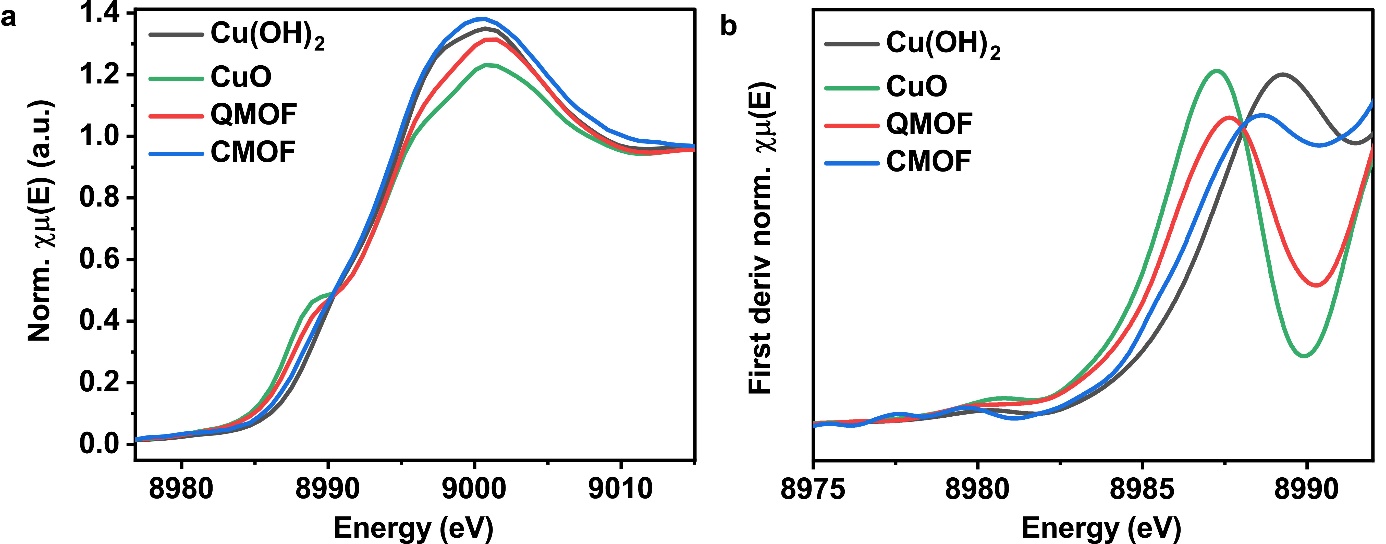


**Supplementary Figure 8.** (a) Normalized Cu K-edge XANES spectra of Cu(OH)2 NWs, CuO, QMOF and CMOF. (b) First-derivative spectra obtained from Cu K-edge XANES spectra.


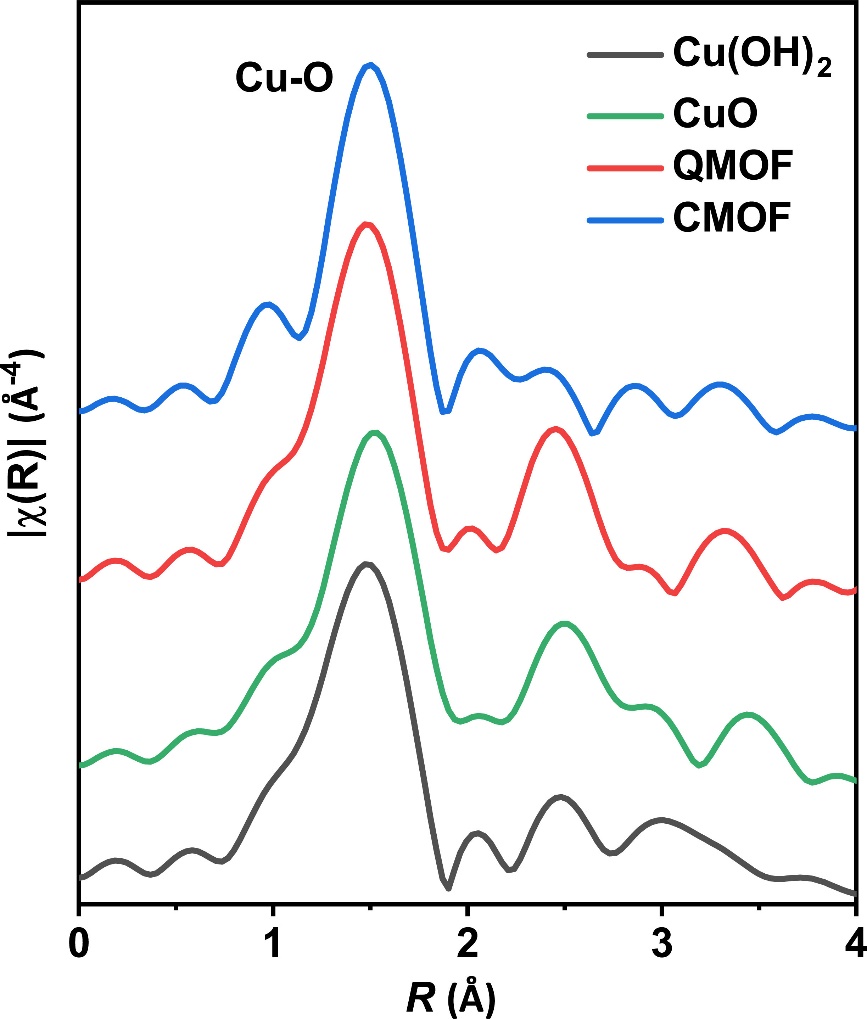


**Supplementary Figure 9.** *K*3-weighted FT-EXAFS spectra of Cu(OH)2 NWs, CuO, QMOF and CMOF.


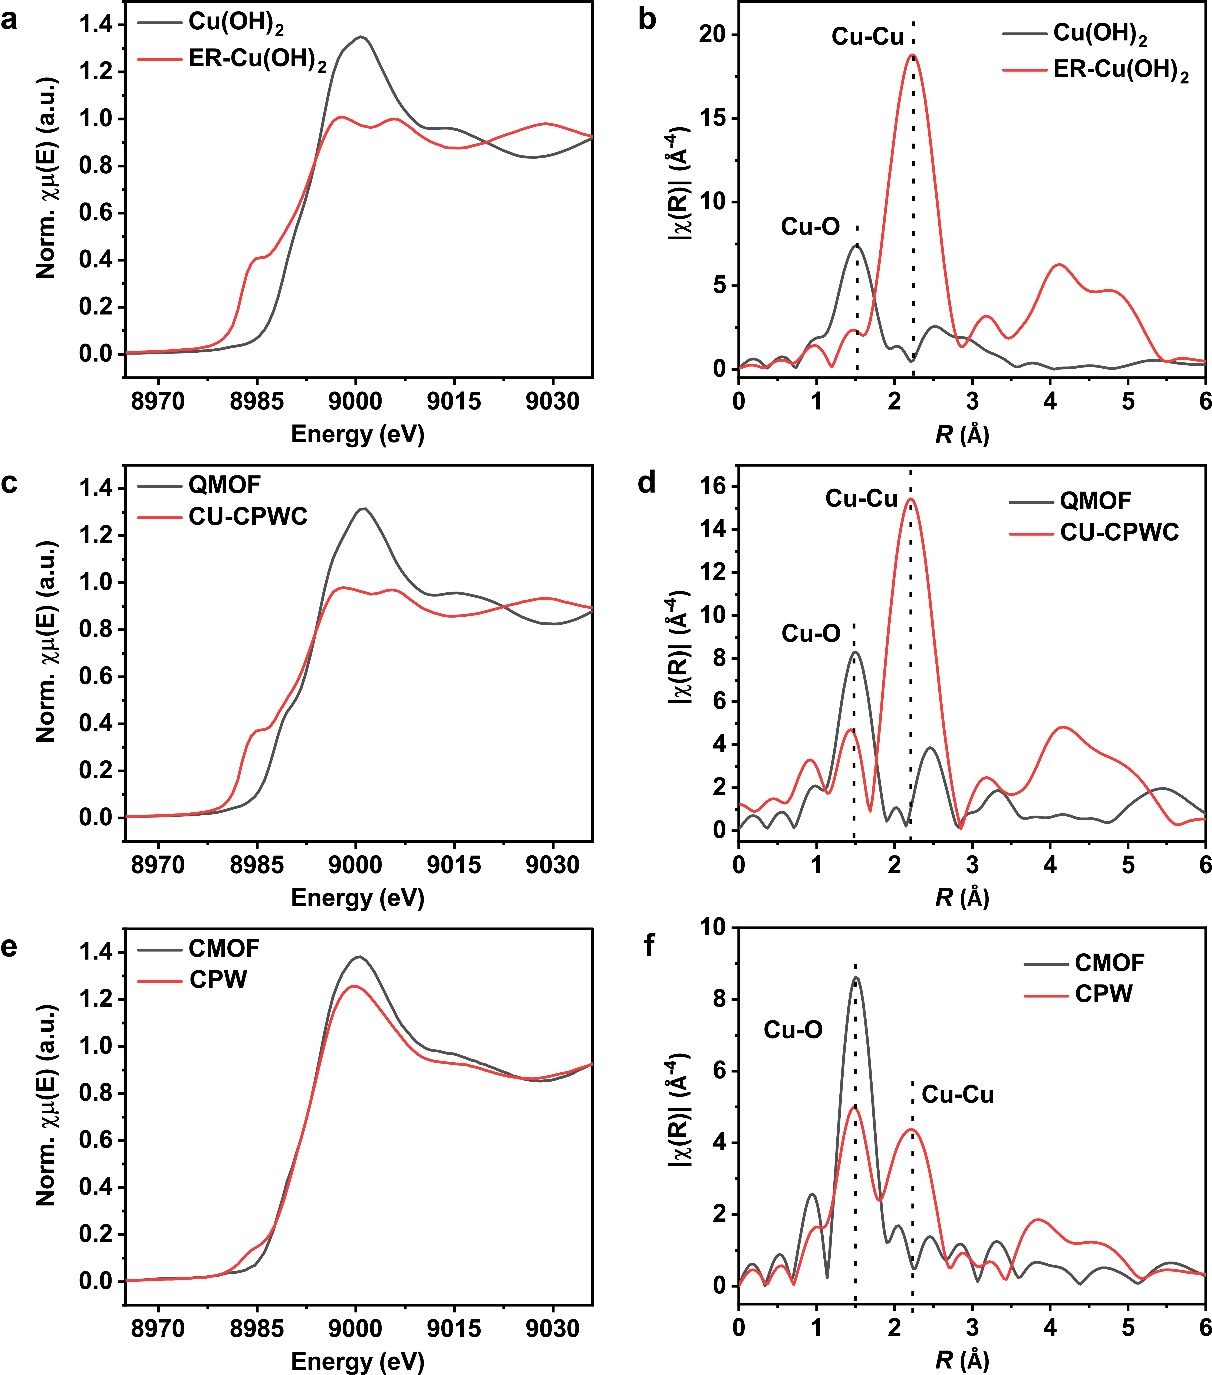


**Supplementary Figure 10.** Comparison of XAS data before and after electrochemical reconstruction: (a, c and e) Cu K-edge XANES spectra, (b, d and f) Corresponding k3-weighted FT-EXAFS spectra of the four samples.


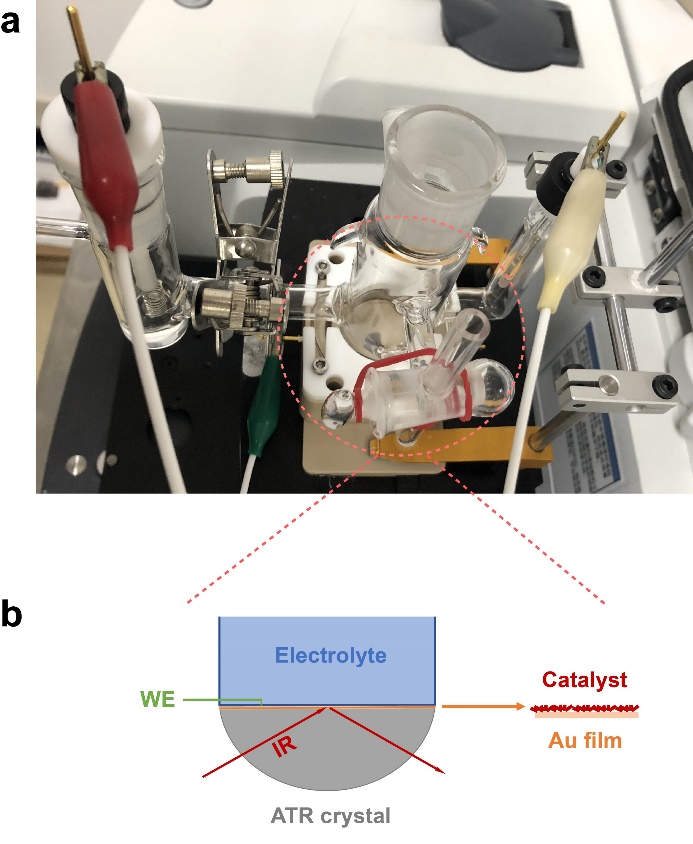


**Supplementary Figure 11.** (a) Electrochemical cell used for ATR-FTIR measurements. (b) Schematic illustration of ATR-FTIR cell.


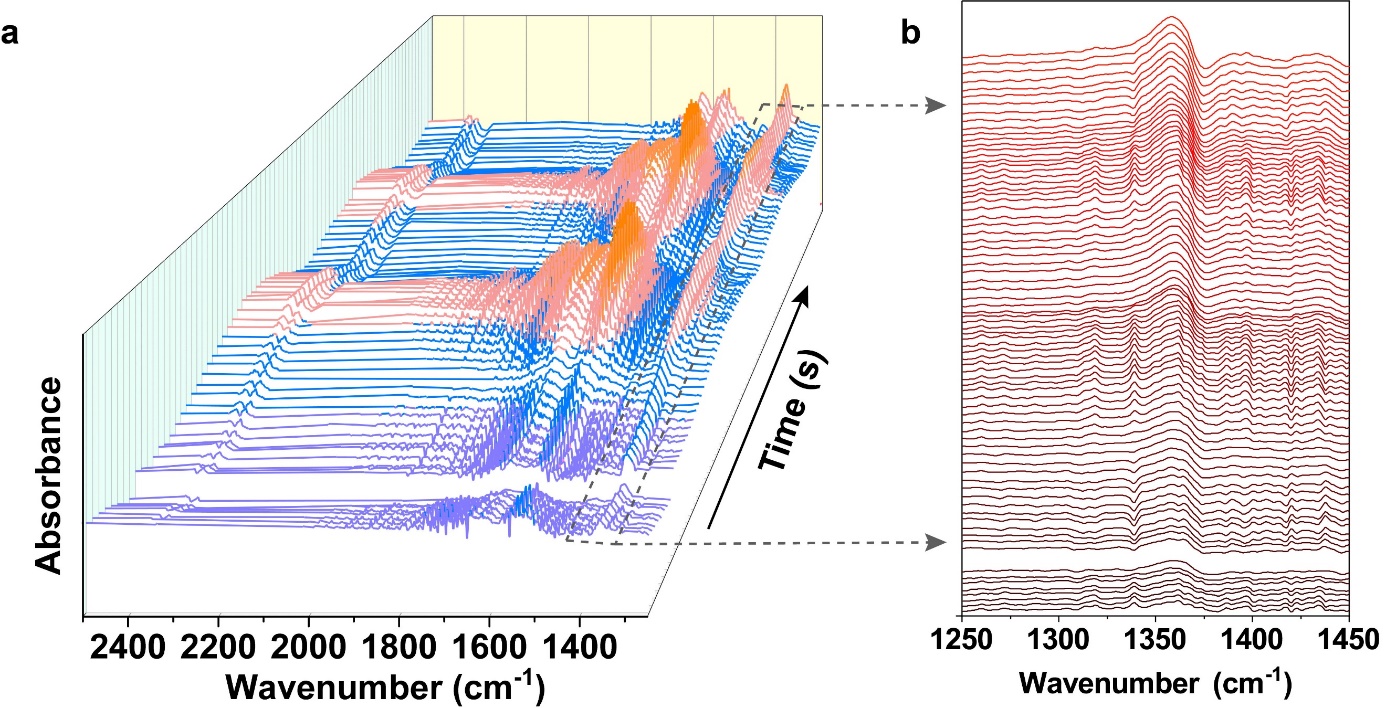


**Supplementary Figure 12.** (a) *In situ* ATR-SEIRA spectra collected on a QMOF cast Au/Si prism electrode with a time resolution of 2 s, using a single-beam spectrum at ∼−0.4 V vs RHE.


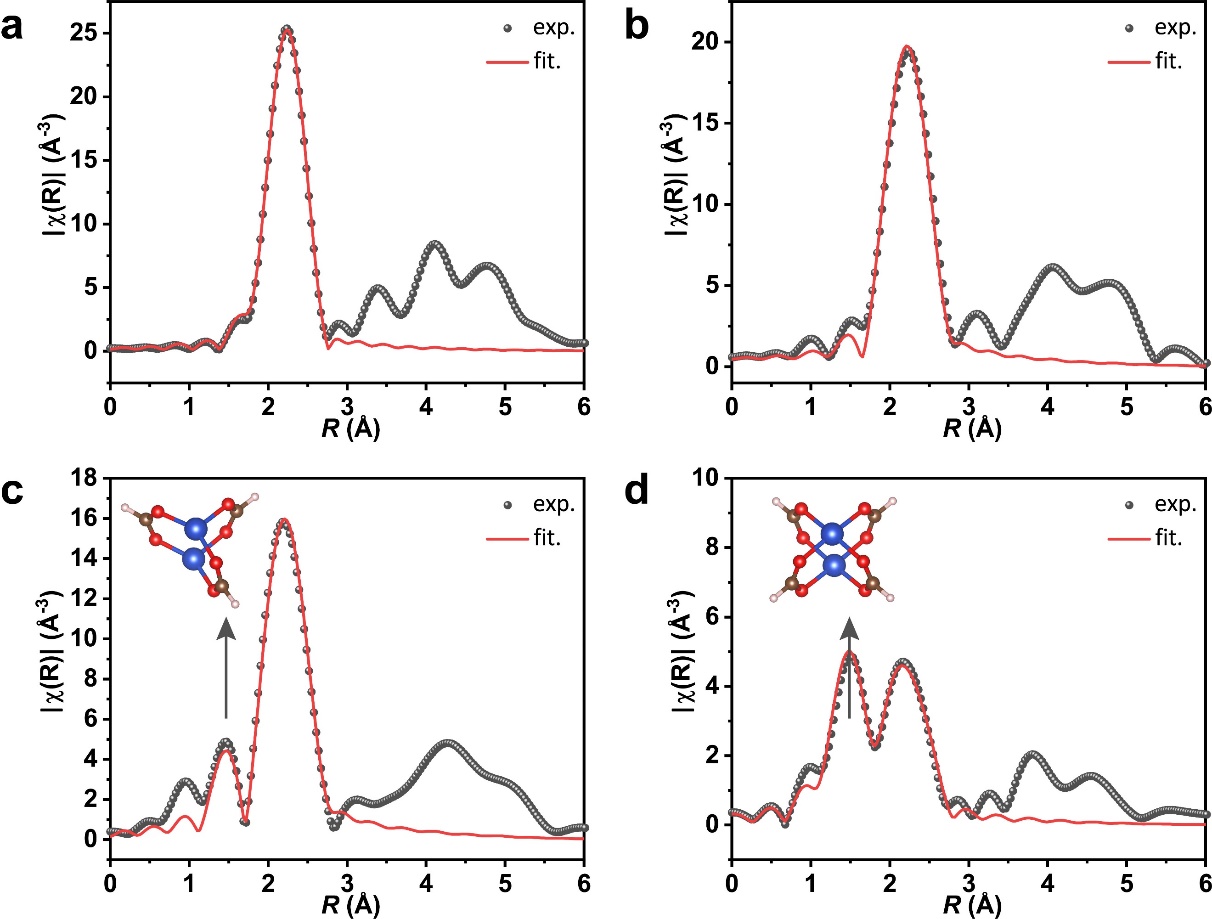


**Supplementary Figure 13.** Corresponding EXAFS *R*-space fitting curves of the four samples. (a) Cu foil, (b) ER-Cu(OH)2, (c) CU-CPWC and (d) CPW.

Table S1. Fitting results of Cu K-edge EXAFS dataa.

| Sample | Scattering path | CN | R (Å) | σ2 (10-3 Å) | R factor | |
| --- | --- | --- | --- | --- | --- | --- |
| Cu foil | Cu-Cu | 12 (set) | 2.54 | 8.81 | 0.0011 |
| ER-Cu(OH)2 | Cu-Cu | 9.65 | 2.53 | 8.22 | 0.010 |
| CU-CPWC | Cu-O | 0.51 | 1.88 | 3.22 | 0.0083 |
| Cu-Cu | 7.55 | 2.52 | 7.96 |
| CPW | Cu-O | 2.54 | 1.94 | 6.01 | 0.0048 |
| Cu-Cu | 3.4 | 2.55 | 10.50 |

a The lengths of Cu-Cu and Cu-O bonds and coordination numbers of Cu atoms are extracted from the curve-fitting for Cu K-edge EXAFS data. CN: coordination number; σ2: Debye−Waller factor. Error bounds that characterize the structural parameters obtained by EXAFS spectroscopy were estimated as CN ± 20 %; R ± 1 %; σ2 ± 20 %.


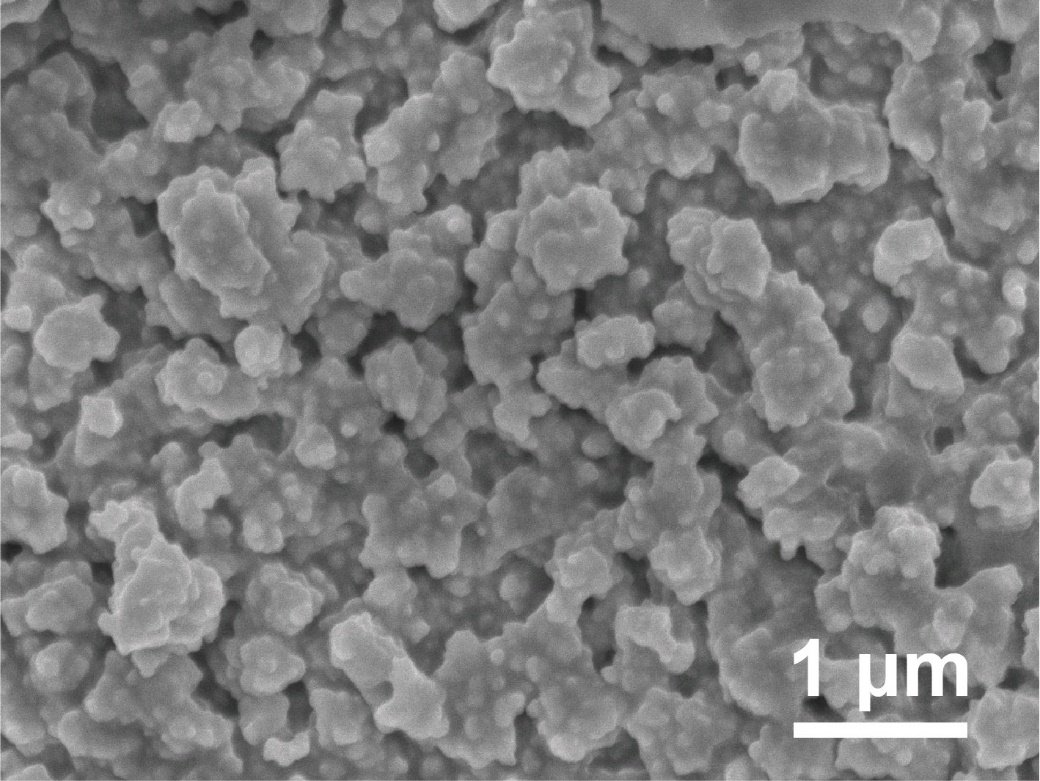


**Supplementary Figure 14.** SEM image of CPW.


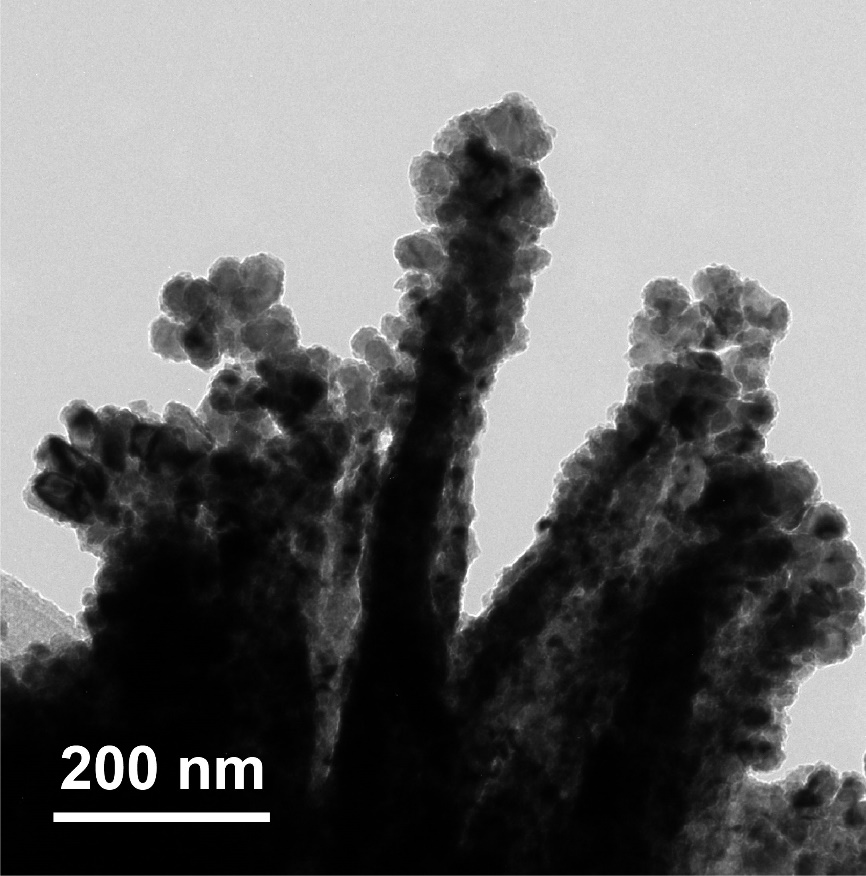


**Supplementary Figure 15.** TEM image of CU-CPWC.


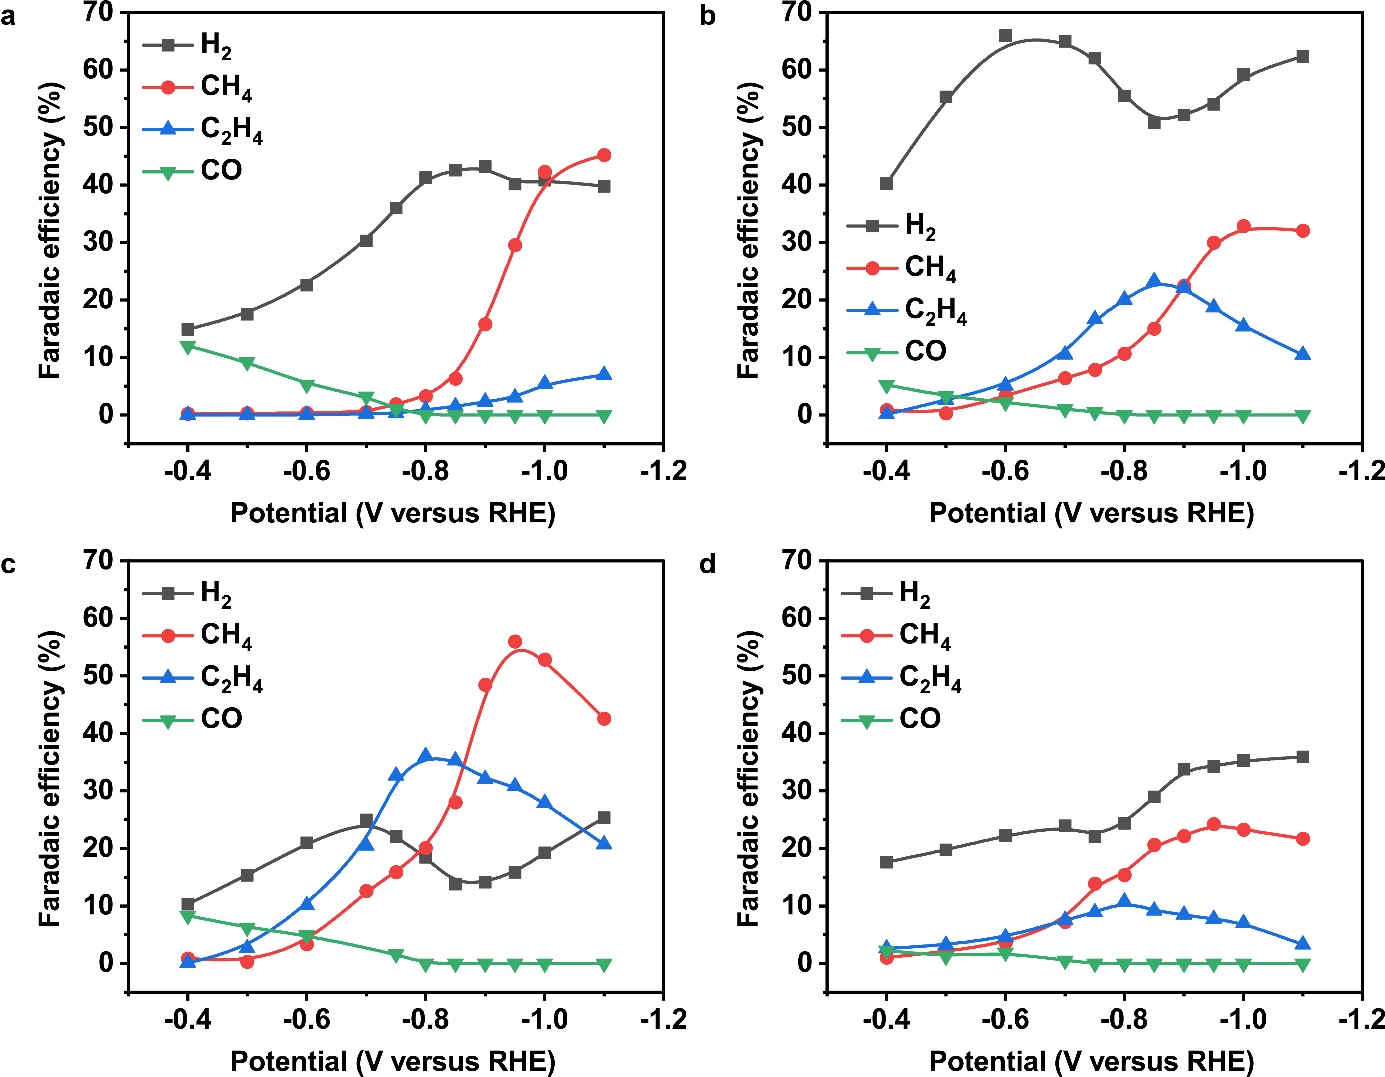


**Supplementary Figure 16.** Product distribution of CO2 reduction on Cu foil (a), ER-Cu(OH)2 NWs (b), CU-CPWC (c), and CPW (d).


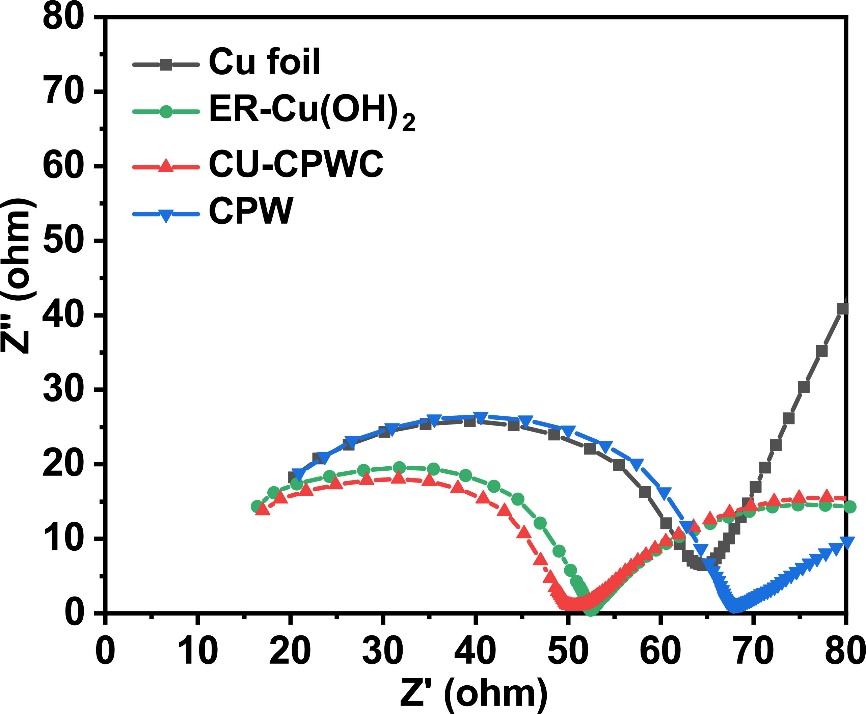


**Supplementary Figure 17.** Nyquist plots of the four samples in CO2-saturated KHCO3 electrolyte.


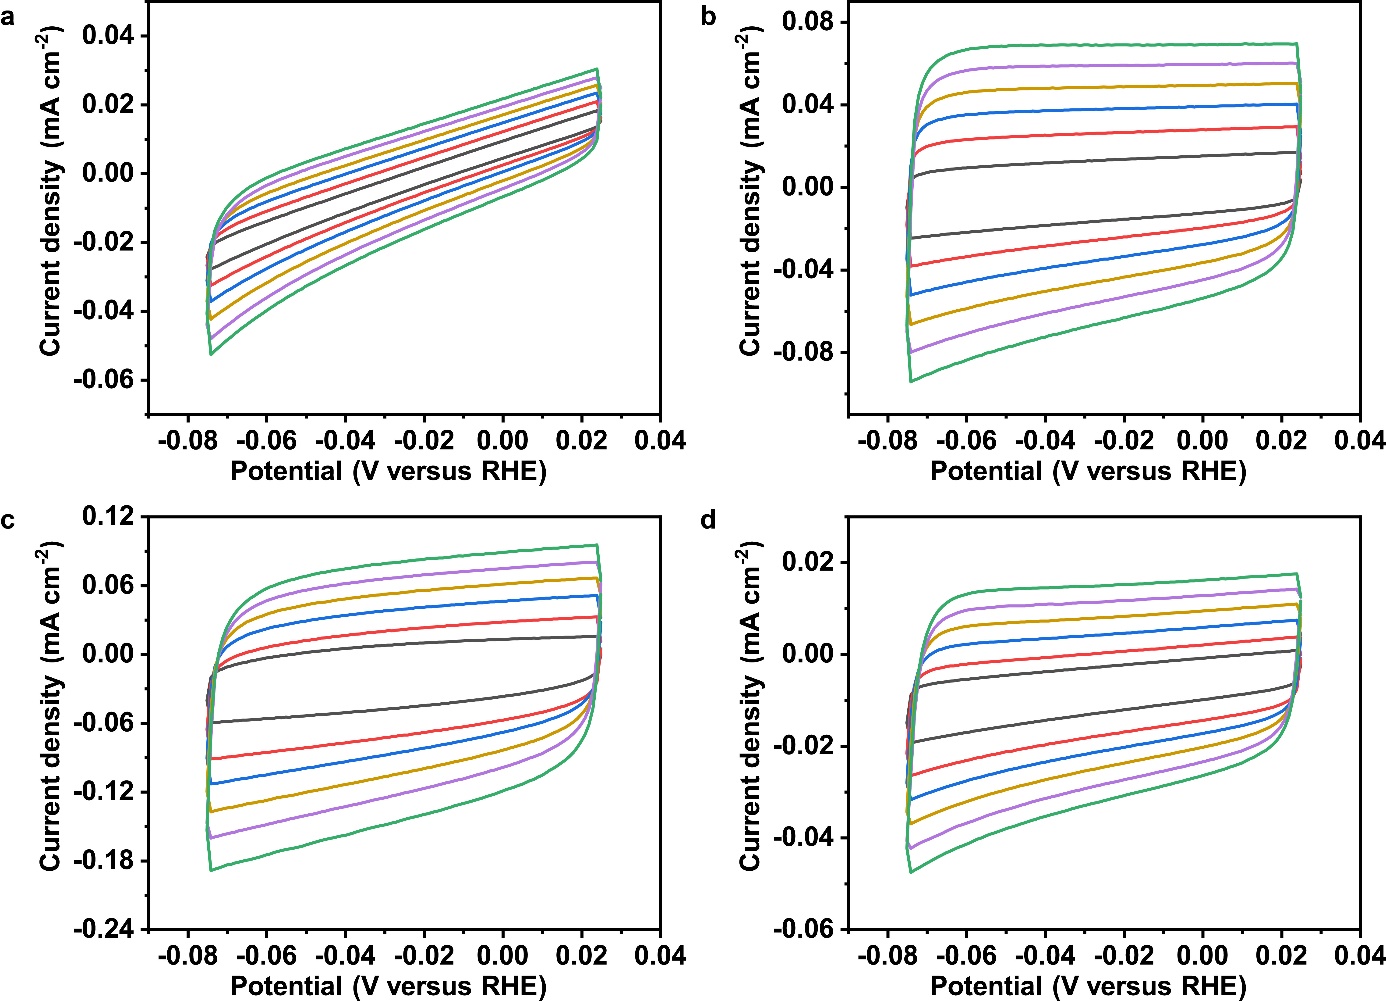


**Supplementary Figure 18.** Cyclic voltammetry scans on Cu foil (a), ER-Cu(OH)2 NWs (b), CU-CPWC (c), and CPW (d) between 0.025 and -0.075 V vs. RHE in CO2-saturated 0.1 M KHCO3 solution at scan rates of 10, 20, 30, 40, 50 and 60 mV s-1.


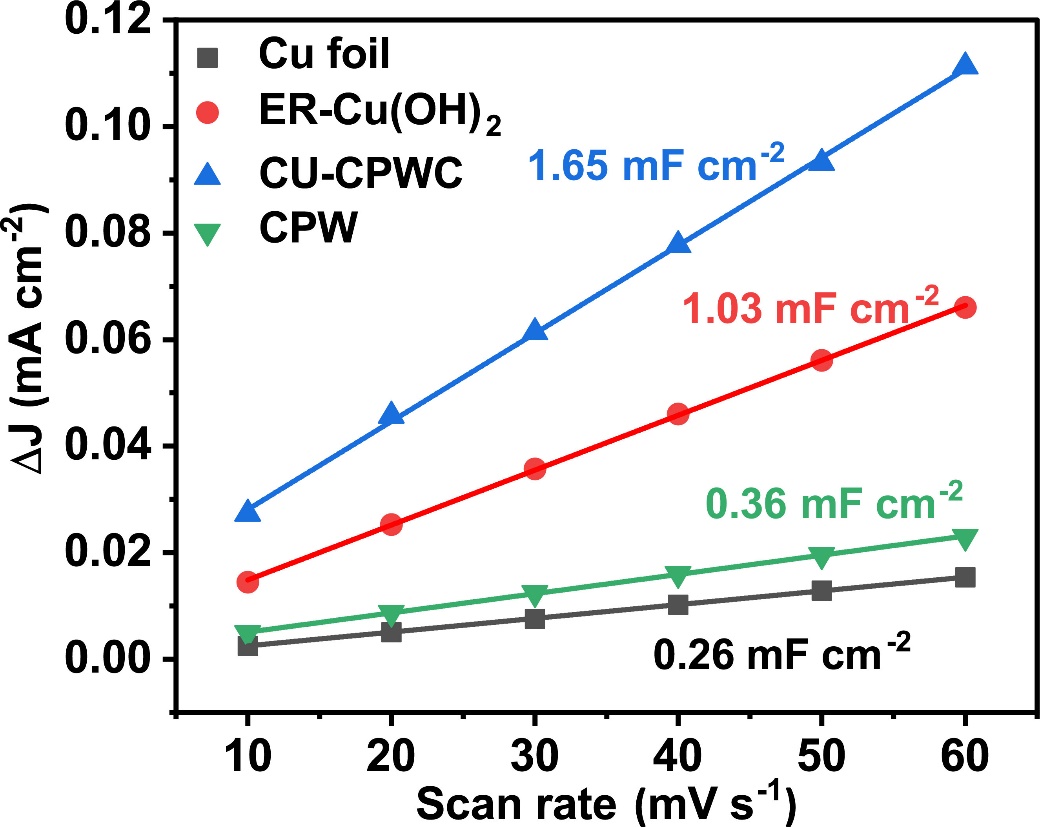


**Supplementary Figure 19.** Extracted currents at -0.02 V vs. RHE as a function of scan rate, leading to a slope indicating a capacitance of 0.26, 1.03. 1.65 and 0.36 mF cm-2 for Cu foil, ER-Cu(OH)2, CU-CPWC and CPW, respectively.


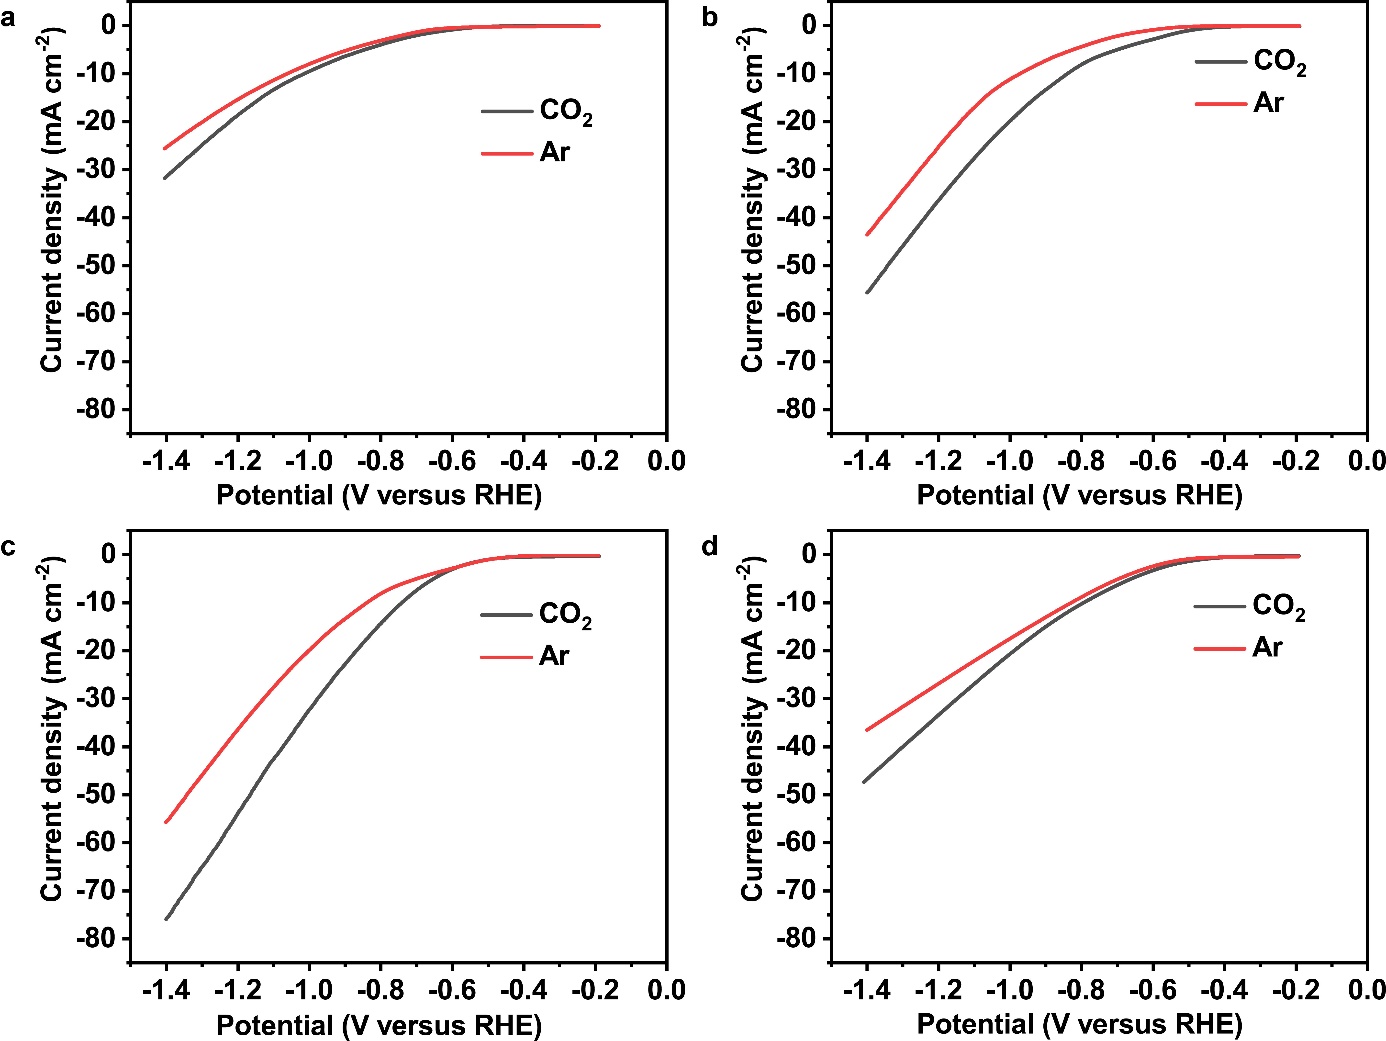


**Supplementary Figure 20.** Comparison of LSV curves in Ar-saturated and CO2-saturated KHCO3 electrolyte for Cu foil (a), ER-Cu(OH)2 NWs (b), CU-CPWC (c) and CPW (d).


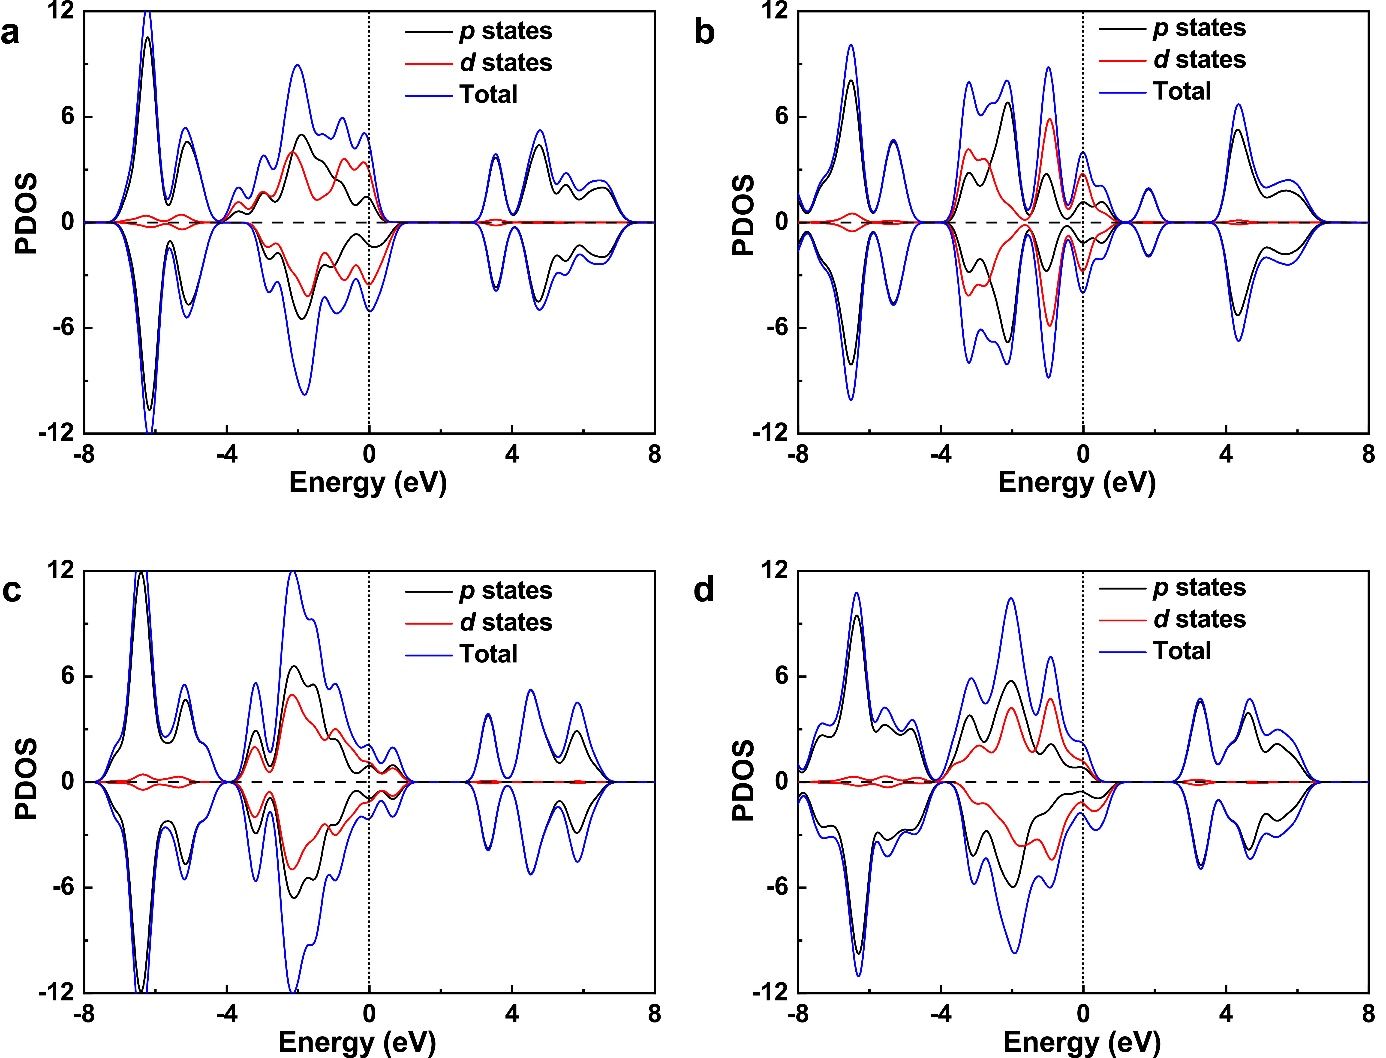


**Supplementary Figure 21.** Spin-orbit projected density of states of Cu-CPWC with CO (a) and CHO (b) adsorption. Spin-orbit projected density of states of Cu-CPW with CO (c) and CHO (d) adsorption.


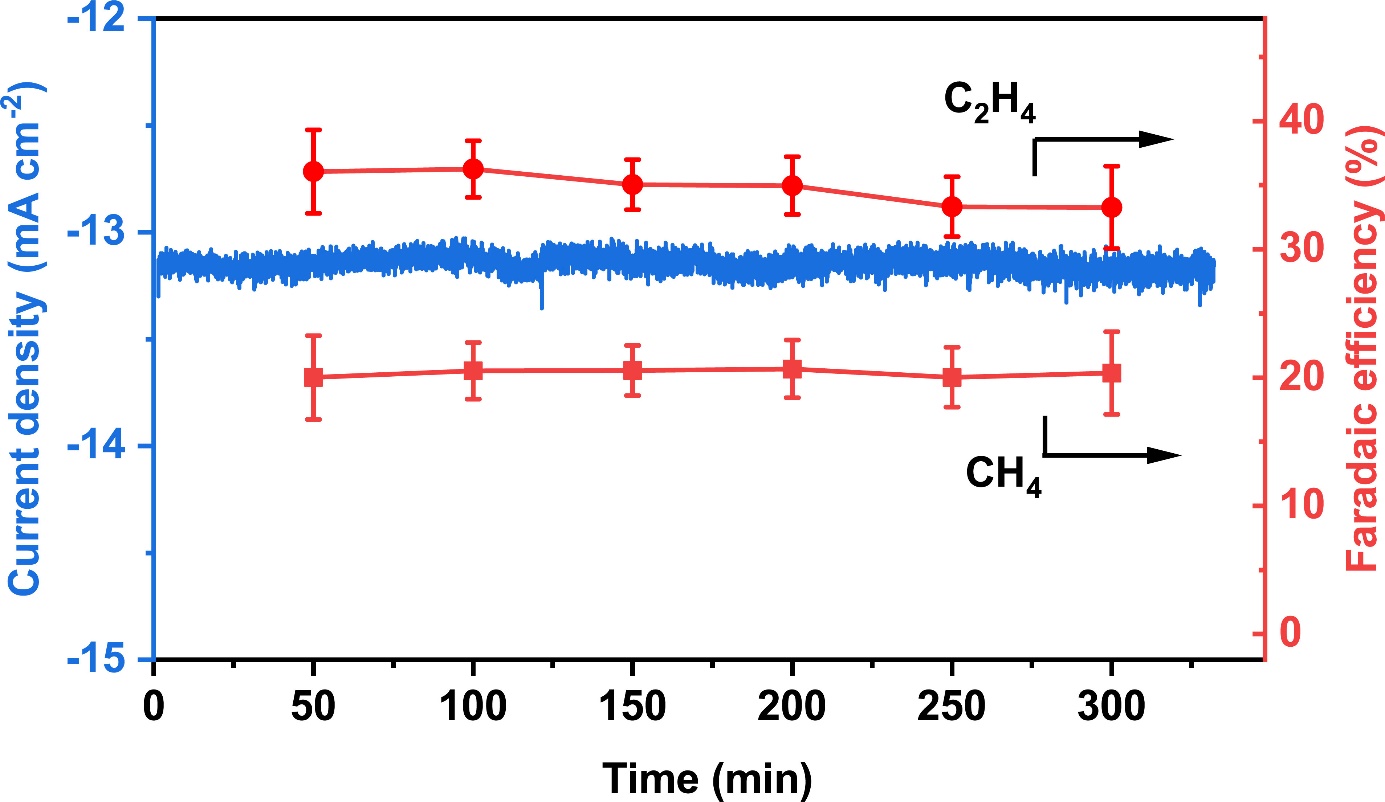


**Supplementary Figure 22.** Chronoamperometry test of CU-CPWC operated at -0.80 V vs. RHE in 0.1 M KHCO3.


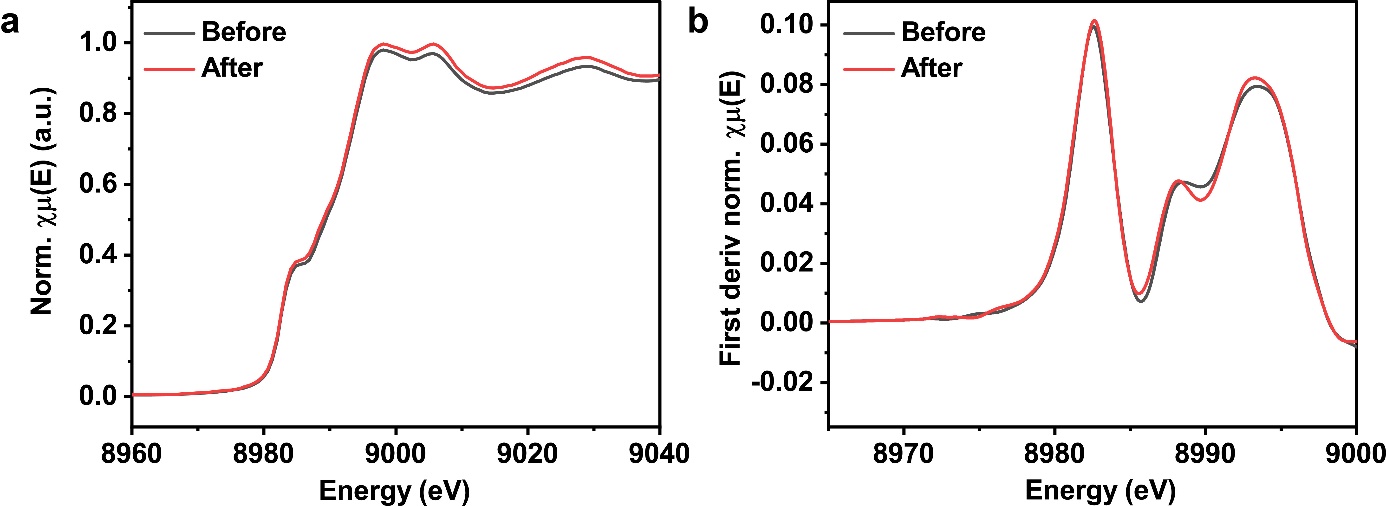


**Supplementary Figure 23.** (a) Comparison of normalized Cu K-edge XANES spectra before and after stability testing of CU-CPWC. (b) First-derivative spectra obtained from (a).


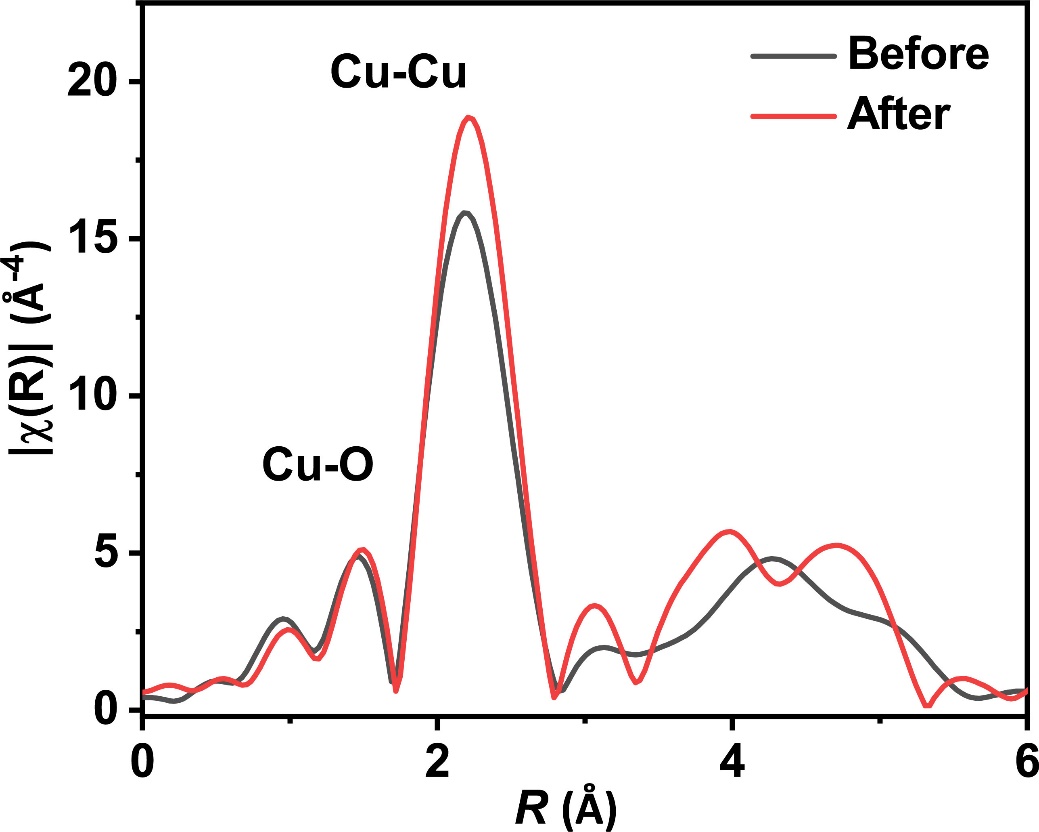


**Supplementary Figure 24.** Comparison of *k*3-weighted FT-EXAFS spectra before and after stability testing of CU-CPWC.
